# Supplementary material for: A Proteomic Platform Unveils the Brain Glycogen Phosphorylase as a Potential Therapeutic Target for Glioblastoma Multiforme
Source: MDPI journal article supplement (doi:10.3390/ijms23158200), 2022-07-25
Supplement: s1 [file s1]

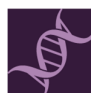

Article

# A proteomic platform unveils the brain glycogen phosphorylase as a potential therapeutic target for glioblastoma multiforme

Giusy Ferraro<sup>1,2</sup>, Matteo Mozzicafreddo<sup>3</sup>, Roberta Ettari<sup>4</sup>, Lorenzo Corsi<sup>5,6\*</sup> and Maria Chiara Monti<sup>1\*</sup>

<sup>1</sup>Department of Pharmacy, University of Salerno, 84084 Fisciano, Italy

<sup>2</sup>PhD Program in Drug Discovery and Development, Department of Pharmacy, University of Salerno, 84084 Fisciano, Italy

<sup>3</sup>Department of Clinical and Molecular Sciences, Università Politecnica delle Marche, 60126 Ancona, Italy

<sup>4</sup>Department of Chemical, Biological, Pharmaceutical and Environmental Sciences, University of Messina, 98168, Messina, Italy

<sup>5</sup>Department of Life Sciences, University of Modena and Reggio Emilia, 41125 Modena, Italy

<sup>6</sup>INBB (Istituto Nazionale di Biostrutture e Biosistemi), 00136 Roma, Italy

\* Correspondence: MCM mcmonti@unisa.it; LC lorenzo.corsi@unimore.it

| DARTS 1   |         |                                                      | Scores |        |         |          |
|-----------|---------|------------------------------------------------------|--------|--------|---------|----------|
| Accession | Mass    | Description                                          | CTRL   | 1g 1uM | 1g 10uM | 1g 100uM |
| Q9P273    | 305'093 | Teneurin-3                                           | 0      | 0      | 0       | 103      |
| Q14315    | 293'407 | Filamin-C                                            | 59     | 78     | 63      | 87       |
| Q9Y490    | 271'766 | Talin-1                                              | 61     | 64     | 73      | 61       |
| Q9NZM1    | 236'100 | Myoferlin                                            | 0      | 0      | 0       | 49       |
| Q15075    | 163'337 | Early endosome antigen 1                             | 87     | 100    | 115     | 115      |
| O75116    | 161'939 | Rho-associated protein kinase 2                      | 0      | 46     | 0       | 57       |
| Q7Z478    | 156'222 | ATP-dependent RNA helicase DHX29                     | 0      | 0      | 0       | 71       |
| Q96J66    | 155'855 | ATP-binding cassette sub-family C member 11          | 0      | 0      | 0       | 80       |
| Q92878    | 154'823 | DNA repair protein RAD50                             | 65     | 67     | 86      | 95       |
| O75976    | 153'919 | Carboxypeptidase D                                   | 0      | 81     | 71      | 110      |
| Q7L576    | 146'742 | Cytoplasmic FMR1-interacting protein 1               | 92     | 100    | 104     | 112      |
| O15067    | 146'297 | Phosphoribosylformylglycinamide synthase             | 43     | 57     | 43      | 61       |
| P41252    | 145'718 | Isoleucine--tRNA ligase, cytoplasmic                 | 89     | 91     | 107     | 100      |
| O15118    | 144'868 | NPC intracellular cholesterol transporter 1          | 0      | 82     | 100     | 0        |
| Q00341    | 141'995 | Vigilin                                              | 0      | 0      | 0       | 64       |
| P26640    | 141'642 | Valine--tRNA ligase                                  | 60     | 78     | 93      | 60       |
| Q5JPE7    | 140'435 | Nodal modulator 2                                    | 0      | 0      | 100     | 0        |
| P29144    | 139'745 | Tripeptidyl-peptidase 2                              | 52     | 70     | 64      | 82       |
| Q92896    | 138'341 | Golgi apparatus protein 1                            | 33     | 80     | 60      | 83       |
| O95373    | 120'751 | Importin-7                                           | 40     | 57     | 73      | 27       |
| Q9Y4F9    | 119'414 | Rho family-interacting cell polarization regulator 2 | 0      | 142    | 150     | 0        |
| P05023    | 114'135 | Sodium/potassium-transporting ATPase subunit alpha-1 | 57     | 57     | 68      | 57       |
| Q15029    | 110'336 | 116 kDa U5 small nuclear ribonucleoprotein component | 0      | 0      | 62      | 54       |
| P06400    | 106'947 | Retinoblastoma-associated protein                    | 0      | 0      | 136     | 0        |
| Q7KZF4    | 102'618 | Staphylococcal nuclease domain-containing protein 1  | 0      | 47     | 53      | 0        |
| P11586    | 102'180 | C-1-tetrahydrofolate synthase, cytoplasmic           | 0      | 0      | 31      | 0        |
| Q13200    | 100'877 | 26S proteasome non-ATPase regulatory subunit 2       | 30     | 43     | 44      | 28       |
| P11216    | 97'319  | Glycogen phosphorylase, brain form                   | 0      | 0      | 0       | 16       |
| Q93050    | 97'148  | V-type proton ATPase 116 kDa subunit a1              | 0      | 0      | 67      | 0        |
| P55072    | 89'950  | Transitional endoplasmic reticulum ATPase            | 0      | 0      | 12      | 10       |
| O60645    | 85'969  | Exocyst complex component 3                          | 0      | 0      | 0       | 67       |
| P16070    | 82'001  | CD44 antigen OS=Homo sapiens                         | 0      | 0      | 22      | 33       |
| P54652    | 70'263  | Heat shock-related 70 kDa protein 2                  | 61     | 74     | 107     | 78       |
| O60506    | 69'788  | Heterogeneous nuclear ribonucleoprotein Q            | 0      | 0      | 11      | 14       |
| P35241    | 68'635  | Radixin                                              | 0      | 0      | 52      | 0        |
| Q8N1G4    | 64'004  | Leucine-rich repeat-containing protein 47            | 0      | 0      | 100     | 0        |
| P30101    | 57'146  | Protein disulfide-isomerase A3                       | 0      | 0      | 50      | 0        |
| P68363    | 50'804  | Tubulin alpha-1B chain                               | 0      | 0      | 100     | 0        |

| Accession     | Mass      | Description                                            | DARTS 2 |        |         |          |
|---------------|-----------|--------------------------------------------------------|---------|--------|---------|----------|
|               |           |                                                        | Scores  |        |         |          |
|               |           |                                                        | CTRL    | 1g 1uM | 1g 10uM | 1g 100uM |
| Q8WXI7        | 1'520'295 | Mucin-16                                               | 97      | 131    | 134     | 128      |
| Q5T4S7        | 580'547   | E3 ubiquitin-protein ligase UBR4                       | 0       | 0      | 93      | 0        |
| Q14204        | 534'809   | Cytoplasmic dynein 1 heavy chain 1                     | 81      | 85     | 103     | 129      |
| Q07954        | 523'150   | Prolow-density lipoprotein receptor-related protein 1  | 98      | 105    | 110     | 128      |
| P78527        | 473'749   | DNA-dependent protein kinase catalytic subunit         | 0       | 0      | 63      | 74       |
| Q9P273        | 305'093   | Teneurin-3                                             | 0       | 0      | 112     | 0        |
| Q01082        | 275'237   | Spectrin beta chain, non-erythrocytic 1                | 0       | 0      | 0       | 71       |
| P24821        | 246'345   | Tenascin                                               | 0       | 0      | 85      | 76       |
| P35579        | 227'646   | Mysion 9                                               | 48      | 65     | 83      | 88       |
| P42694        | 220'601   | Probable helicase with zinc finger domain              | 0       | 0      | 0       | 114      |
| Q8TF72        | 218'321   | Protein Shroom3 OS=Homo sapiens                        | 0       | 0      | 75      | 0        |
| O14647        | 212'183   | Chromodomain-helicase-DNA-binding protein 2            | 0       | 118    | 147     | 0        |
| Q6PQ08        | 197'569   | Microtubule-associated serine/threonine-protein kinase | 0       | 0      | 103     | 97       |
| Q9H792        | 195'039   | Inactive tyrosine-protein kinase PEAK1                 | 0       | 0      | 0       | 93       |
| Q86UP2        | 156'464   | Kinectin                                               | 0       | 0      | 0       | 33       |
| Q56UN5        | 151'982   | Mitogen-activated protein kinase kinase kinase 19      | 0       | 0      | 90      | 65       |
| O15067        | 146'297   | Phosphoribosylformylglycinamide synthase               | 0       | 0      | 0       | 150      |
| Q92896        | 138'341   | Golgi apparatus protein 1 OS=Homo sapiens              | 52      | 52     | 59      | 59       |
| O95347        | 136'085   | Structural maintenance of chromosomes protein 2        | 0       | 0      | 143     | 162      |
| Q12768        | 135'113   | WASH complex subunit 5                                 | 0       | 0      | 62      | 0        |
| Q7Z5K2        | 134'516   | Wings apart-like protein homolog                       | 0       | 0      | 0       | 136      |
| O43847        | 132'644   | Nardilysin                                             | 0       | 0      | 55      | 0        |
| Q16531        | 128'142   | DNA damage-binding protein 1                           | 85      | 90     | 95      | 90       |
| Q9NQ38        | 124'343   | Serine protease inhibitor Kazal-type 5                 | 0       | 0      | 0       | 76       |
| P53396        | 121'674   | ATP-citrate synthase                                   | 0       | 0      | 0       | 47       |
| <b>O95373</b> | 120'751   | Importin-7                                             | 0       | 0      | 36      | 33       |
| P06756        | 117'048   | Integrin alpha-V                                       | 58      | 58     | 69      | 73       |
| Q6IEE7        | 116'819   | Transmembrane protein 132E                             | 0       | 0      | 57      | 0        |
| Q7Z410        | 116'115   | Transmembrane protease serine 9                        | 0       | 0      | 164     | 0        |
| Q02413        | 114'702   | Desmoglein-1                                           | 0       | 50     | 114     | 121      |
| P12109        | 109'602   | Collagen alpha-1(VI) chain                             | 0       | 0      | 53      | 71       |
| P36776        | 106'936   | Lon protease homolog, mitochondrial                    | 0       | 0      | 106     | 0        |
| P12814        | 103'563   | Alpha-actinin-1                                        | 0       | 0      | 0       | 82       |
| P27987        | 103'167   | Inositol-trisphosphate 3-kinase B                      | 0       | 0      | 0       | 79       |
| Q14974        | 98'420    | Importin subunit beta-1                                | 0       | 0      | 0       | 109      |
| P11216        | 97'319    | Glycogen phosphorylase, brain form                     | 0       | 0      | 0       | 78       |
| P34932        | 95'127    | Heat shock 70 kDa protein 4                            | 0       | 0      | 38      | 0        |
| P55072        | 89950     | Transitional endoplasmic reticulum ATPase              | 200     | 286    | 248     | 290      |
| Q15436        | 87018     | Protein transport protein Sec23A                       | 0       | 0      | 0       | 120      |
| Q01813        | 86454     | ATP-dependent 6-phosphofructokinase, platelet type     | 119     | 108    | 142     | 150      |
| Q99798        | 86113     | Aconitate hydratase, mitochondrial                     | 156     | 256    | 156     | 222      |
| O00469        | 85'373    | Procollagen-lysine,2-oxoglutarate 5-dioxygenase 2      | 0       | 0      | 0       | 58       |
| P07900        | 85'006    | Heat shock protein HSP 90-alpha                        | 0       | 0      | 100     | 100      |
| Q96G03        | 68'754    | Phosphoglucomutase-2                                   | 52      | 90     | 95      | 105      |
| P38606        | 68'660    | V-type proton ATPase catalytic subunit A               | 94      | 135    | 147     | 147      |
| P27824        | 67'982    | Calnexin                                               | 0       | 0      | 0       | 47       |
| Q9NSD9        | 66'701    | Phenylalanine--tRNA ligase beta subunit                | 0       | 0      | 0       | 55       |
| Q8TF66        | 65'238    | Leucine-rich repeat-containing protein 15              | 0       | 58     | 67      | 50       |
| O15371        | 64'560    | Eukaryotic translation initiation factor 3 subunit D   | 0       | 0      | 0       | 85       |
| P31948        | 63'227    | Stress-induced-phosphoprotein 1                        | 44      | 42     | 45      | 61       |
| O14773        | 61'723    | Tripeptidyl-peptidase 1                                | 0       | 0      | 75      | 100      |
| P04062        | 60'134    | Lysosomal acid glucosylceramidase                      | 0       | 60     | 100     | 100      |
| Q5VTE0        | 50'495    | Putative elongation factor 1-alpha-like 3              | 0       | 108    | 92      | 115      |

| DARTS 3   |         |                                                               | Scores |        |         |          |
|-----------|---------|---------------------------------------------------------------|--------|--------|---------|----------|
| Accession | Mass    | Description                                                   | CTRL   | 1g 1uM | 1g 10uM | 1g 100uM |
| Q07954    | 523'150 | Prolow-density lipoprotein receptor-related protein 1         | 61     | 113    | 66      | 74       |
| P78527    | 473'749 | DNA-dependent protein kinase catalytic subunit                | 0      | 0      | 43      | 0        |
| Q01082    | 275'237 | Spectrin beta chain, non-erythrocytic 1                       | 100    | 123    | 110     | 85       |
| P35579    | 227'646 | Myosin-9 OS=Homo sapiens                                      | 47     | 59     | 60      | 51       |
| Q02952    | 191'937 | A-kinase anchor protein 12                                    | 0      | 0      | 0       | 110      |
| Q08378    | 167'765 | Golgin subfamily A member 3                                   | 0      | 16     | 32      | 0        |
| Q14152    | 166'867 | Eukaryotic translation initiation factor 3 subunit A          | 0      | 0      | 0       | 7        |
| Q982F9    | 163'545 | Uveal autoantigen with coiled-coil domains and ankyrin re     | 0      | 0      | 47      | 0        |
| Q08211    | 142'181 | ATP-dependent RNA helicase A                                  | 0      | 61     | 55      | 50       |
| Q00341    | 141'995 | Vigilin                                                       | 63     | 91     | 69      | 80       |
| P26640    | 141'642 | Valine--tRNA ligase                                           | 76     | 78     | 82      | 53       |
| Q15393    | 136'575 | Splicing factor 3B subunit 3                                  | 45     | 55     | 68      | 36       |
| Q9P2J5    | 135'577 | Leucine--tRNA ligase, cytoplasmic OS=Homo sapiens OX=5        | 0      | 0      | 29      | 0        |
| Q16531    | 128'142 | DNA damage-binding protein 1                                  | 61     | 82     | 71      | 73       |
| Q12965    | 127'552 | Unconventional myosin-Ie                                      | 0      | 41     | 0       | 0        |
| Q92900    | 125'578 | Regulator of nonsense transcripts 1                           | 45     | 106    | 97      | 100      |
| Q60566    | 120'781 | Mitotic checkpoint serine/threonine-protein kinase BUB1       | 0      | 0      | 100     | 0        |
| Q95373    | 120'751 | Importin-7                                                    | 0      | 73     | 91      | 0        |
| P53992    | 119'789 | Protein transport protein Sec24C                              | 0      | 0      | 29      | 0        |
| Q8N7K1    | 115'724 | RNA-binding motif protein, X-linked-like-3                    | 52     | 100    | 122     | 0        |
| Q94855    | 114'476 | Protein transport protein Sec24D                              | 0      | 0      | 30      | 0        |
| Q43592    | 111'148 | Exportin-T                                                    | 0      | 0      | 0       | 38       |
| O60763    | 108'740 | General vesicular transport factor p115                       | 0      | 0      | 0       | 20       |
| Q99460    | 106'795 | 26S proteasome non-ATPase regulatory subunit 1                | 0      | 48     | 39      | 52       |
| Q99613    | 105'962 | Eukaryotic translation initiation factor 3 subunit C          | 0      | 0      | 0       | 73       |
| P52789    | 103'739 | Hexokinase-2                                                  | 60     | 62     | 63      | 54       |
| P12814    | 103'563 | Alpha-actinin-1                                               | 560    | 580    | 400     | 620      |
| P35606    | 103'278 | Coatomer subunit beta                                         | 36     | 46     | 54      | 36       |
| Q7KZF4    | 102'618 | Staphylococcal nuclease domain-containing protein 1           | 633    | 633    | 700     | 683      |
| P11586    | 102'180 | C-1-tetrahydrofolate synthase, cytoplasmic                    | 0      | 45     | 27      | 73       |
| P11216    | 97'319  | Glycogen phosphorylase, brain form                            | 200    | 250    | 175     | 275      |
| Q96QK1    | 92'447  | Vacuolar protein sorting-associated protein 35                | 48     | 52     | 62      | 52       |
| P55072    | 89'950  | Transitional endoplasmic reticulum ATPase                     | 350    | 406    | 344     | 478      |
| P42224    | 87'850  | Signal transducer and activator of transcription 1-alpha/beta | 0      | 22     | 67      | 67       |
| Q01813    | 86'454  | ATP-dependent 6-phosphofructokinase, platelet type            | 63     | 67     | 79      | 96       |
| Q12797    | 86'266  | Aspartyl/asparaginyl beta-hydroxylase                         | 0      | 0      | 33      | 50       |
| P49589    | 86'103  | Cysteine--tRNA ligase, cytoplasmic                            | 0      | 80     | 0       | 100      |
| P08237    | 85'984  | ATP-dependent 6-phosphofructokinase, muscle type              | 73     | 82     | 82      | 100      |
| Q96TA1    | 84'598  | Protein Niban 2                                               | 0      | 13     | 42      | 13       |
| P41250    | 83'854  | Glycine--tRNA ligase                                          | 90     | 94     | 94      | 106      |
| P22033    | 83'538  | Methylmalonyl-CoA mutase, mitochondrial                       | 0      | 0      | 67      | 33       |
| Q12996    | 83'325  | Cleavage stimulation factor subunit 3                         | 0      | 0      | 0       | 200      |
| Q9NY33    | 82'880  | Dipeptidyl peptidase 3                                        | 106    | 135    | 118     | 129      |
| P13798    | 82'142  | Acylamino-acid-releasing enzyme                               | 80     | 100    | 120     | 127      |
| P48147    | 81'560  | Prolyl endopeptidase                                          | 29     | 43     | 71      | 86       |
| Q95573    | 81'338  | Long-chain-fatty-acid--CoA ligase 3                           | 36     | 36     | 64      | 64       |
| P43304    | 81'315  | Glycerol-3-phosphate dehydrogenase, mitochondrial             | 0      | 0      | 100     | 0        |
| Q8NBF2    | 80'249  | NHL repeat-containing protein 2                               | 0      | 0      | 13      | 13       |
| O60488    | 80'220  | Long-chain-fatty-acid--CoA ligase 4                           | 121    | 129    | 114     | 179      |
| Q06210    | 79'555  | Glutamine--fructose-6-phosphate aminotransferase [ison        | 0      | 0      | 36      | 0        |
| P33121    | 78'919  | Long-chain-fatty-acid--CoA ligase 1                           | 0      | 0      | 143     | 157      |
| P08253    | 74'918  | 72 kDa type IV collagenase                                    | 0      | 50     | 67      | 100      |
| P38646    | 73'920  | Stress-70 protein, mitochondrial                              | 90     | 92     | 122     | 115      |
| Q9H4A4    | 73'234  | Aminopeptidase B                                              | 63     | 75     | 81      | 88       |
| Q13409    | 71'811  | Cytoplasmic dynein 1 intermediate chain 2                     | 44     | 67     | 100     | 100      |
| Q43390    | 71'184  | Heterogeneous nuclear ribonucleoprotein R                     | 26     | 26     | 43      | 39       |
| P49748    | 70'745  | Very long-chain specific acyl-CoA dehydrogenase, mitoch       | 100    | 111    | 106     | 111      |
| Q9NQW7    | 70'558  | Xaa-Pro aminopeptidase 1                                      | 75     | 75     | 106     | 131      |
| P54652    | 70'263  | Heat shock-related 70 kDa protein 2                           | 78     | 80     | 108     | 88       |
| P17844    | 69'618  | Probable ATP-dependent RNA helicase DDX5                      | 58     | 63     | 54      | 75       |
| P43378    | 68'547  | Tyrosine-protein phosphatase non-receptor type 9              | 0      | 43     | 243     | 257      |
| Q98YC5    | 66'930  | Alpha-(1,6)-fucosyltransferase                                | 80     | 80     | 90      | 120      |
| Q07866    | 65'782  | Kinesin light chain 1                                         | 0      | 0      | 21      | 32       |
| Q96AY3    | 64'717  | Peptidyl-prolyl cis-trans isomerase FKBP10                    | 140    | 140    | 160     | 100      |
| P21589    | 63'898  | 5'-nucleotidase                                               | 100    | 107    | 80      | 113      |
| Q13057    | 62'632  | Bifunctional coenzyme A synthase                              | 63     | 63     | 75      | 75       |
| Q96L92    | 61'854  | Sorting nexin-27                                              | 0      | 60     | 60      | 60       |
| P10155    | 61'372  | 60 kDa SS-A/Ro ribonucleoprotein                              | 79     | 89     | 89      | 63       |
| Q9H857    | 61'022  | 5'-nucleotidase domain-containing protein 2                   | 0      | 100    | 67      | 100      |
| Q15392    | 60'803  | Delta(24)-sterol reductase                                    | 0      | 50     | 0       | 75       |
| Q16222    | 59'131  | UDP-N-acetylhexosamine pyrophosphorylase                      | 54     | 69     | 54      | 69       |
| Q92692    | 58'162  | Nectin-2                                                      | 125    | 125    | 125     | 175      |
| P49257    | 57'798  | Protein ERGIC-53                                              | 30     | 52     | 30      | 70       |
| P30837    | 57'626  | Aldehyde dehydrogenase X, mitochondrial                       | 57     | 64     | 71      | 86       |
| Q9NNW7    | 57'156  | Thioredoxin reductase 2, mitochondrial                        | 100    | 125    | 125     | 75       |
| Q94788    | 57'144  | Retinal dehydrogenase 2                                       | 0      | 78     | 89      | 0        |
| Q15758    | 57'018  | Neutral amino acid transporter B(0)                           | 33     | 67     | 67      | 100      |
| Q9UHG3    | 57'003  | Prenylcysteine oxidase 1                                      | 85     | 92     | 85      | 108      |
| Q9Y3I0    | 55'688  | RNA-splicing ligase RtcB homolog                              | 119    | 138    | 106     | 138      |
| Q13509    | 50'856  | Tubulin beta-3 chain                                          | 0      | 0      | 13      | 0        |
| Q9Y265    | 50'538  | RuvB-like 1                                                   | 35     | 45     | 45      | 50       |

**Figure S1:** For each DARTS experiment, it has been reported the entire list of proteins which are protected by 1g at least at one concentration, together with their Mascot Score.

| Accession | Score | Mass   | Matches | Match(sig) | Sequences | Seq(sig) | emPAI | Description                               |
|-----------|-------|--------|---------|------------|-----------|----------|-------|-------------------------------------------|
| P11216    | 281   | 97319  | 25      | 11         | 25        | 11       | 0.71  | Glycogen phosphorylase, brain form        |
| Accession | Score | Mass   | Matches | Match(sig) | Sequences | Seq(sig) | emPAI | Description                               |
| P55072    | 354   | 89950  | 51      | 18         | 39        | 16       | 1.45  | Transitional endoplasmic reticulum ATPase |
| Accession | Score | Mass   | Matches | Match(sig) | Sequences | Seq(sig) | emPAI | Description                               |
| O95373    | 291   | 120751 | 33      | 14         | 25        | 13       | 0.67  | Importin-7                                |

### MASCOT Search Results

#### Protein View: P11216

Glycogen phosphorylase, brain form OS=Homo sapiens OX=9606 GN=PYGB PE=1 SV=5

Database: SwissProt\_AC  
Score: 281  
Nominal mass (M<sub>r</sub>): 97319  
Calculated pI: 6.40  
Taxonomy: [Homo sapiens](#)

Sequence similarity is available as an [NCBI BLAST search of P11216 against nr](#).

#### Search parameters

MS data file: G:\GISTV\20201122\_19\_DARTS1\_B4\_lye.mgf  
Enzyme: Trypsin: cuts C-term side of KR unless next residue is P.  
Fixed modifications: [Carbamidomethyl \(C\)](#)  
Variable modifications: [Oxidation \(M\)](#), [Phospho \(ST\)](#)

Protein sequence coverage: 32%

Matched peptides shown in **bold red**.

```

1  HGFLLIDSEK RQGISYVGLA GLOQVAEVRK STFRALRFLI YGSRVATPR
51  DYPFALANTV RHLVORIR TOOHVERDP KRIYVLEEF YHRTLGWTH
101  YHSLQIACD EATVQGLDL EELREIEEA GLOHGLRLI AACPDSIAT
151  LGLAAYVGI RYEFQINQK IVHGVVEEA DQWLVGNW EKAREEYELP
201  YHFSRVEIK PQQVRILOQ VYLAHVCTP VYGVNNTVY TMLWSAKAP
251  DTFELGGHY QVIEAVLRH ELADISIRV YHNSFFGR ELALQGEIVY
301  VIALTGITR RFSRFFDQR SPVTRFTY FQMAQLND TPAALSTPL
351  MSLVGVGVY QMGRKEITK KCAVNTVY LFEALSRVF STFRFLIRK
401  LEITVADQR ELHVAALFP QDVHLSRMS VEEHGGWRI ENHGLGVDS
451  KAHGVVARK SEIVGQVFK DFYLESEK QHTVGIIFR EMLLCNPL
501  ADIVKEIKR EPLTDLQK ELFLVSEVY FIRDVAVQD ENKLFSAFL
551  EKEIVETFP SMTFVRYR IREYVQLLH CLVPTLVGR IREDEKARY
601  FRTVGGKRA AFQVRIAKLI ILKVTSLGV VNSDPVVGK LRVFLEMYR
651  YSLAEVIPA ADLSQQISTA QTEASQGNK KTCGLSALT GTDQANVTN
701  KEASAKELF IFGLRVEDY ALDRGVNAR EYTHRLRLK GAVGDSDF
751  FSRPEVCKR DIVNHLHMD RPYVADYEA THQCAQVQD LVNRFHWYK

```

### MASCOT Search Results

#### Protein View: P55072

Transitional endoplasmic reticulum ATPase OS=Homo sapiens OX=9606 GN=VCP PE=1 SV=4

Database: SwissProt\_AC  
Score: 354  
Nominal mass (M<sub>r</sub>): 89950  
Calculated pI: 5.14  
Taxonomy: [Homo sapiens](#)

Sequence similarity is available as an [NCBI BLAST search of P55072 against nr](#).

#### Search parameters

MS data file: G:\GISTV\20201122\_19\_DARTS1\_B4\_lye.mgf  
Enzyme: Trypsin: cuts C-term side of KR unless next residue is P.  
Fixed modifications: [Carbamidomethyl \(C\)](#)  
Variable modifications: [Oxidation \(M\)](#), [Phospho \(ST\)](#)

Protein sequence coverage: 51%

Matched peptides shown in **bold red**.

```

1  HASGDSFG DSTALLQK HRFRLVGE ALREDFVYS LSGYVDELQ
51  LPRGVVLLK QWSREAVCI VLSGDTGDE FIDSRVWVW RLRVLAQVI
101  SIQPCVQVY QSRDNYLSD DVEGIDGTH FEYVLEFVL EATSDISGD
151  IFLVQKQMA YEFQVETDS SPVCIAPDT VINCESEPIK RDEDEESLQ
201  VQSDGSGGR EQLAQIKDY ELFLRRLALF KALQVFFRG ILLYVPPQD
251  KTLIARAVN ETGAFFLIN GFELHSLAD ESKENLRAP EKARKNAFI
301  IFIDELDAIA FDEFTNBEV ESRIVQLLT LMDQLKRA VVMAATHRP
351  NSIDFALNF GRFEHWDIO IFDVGRLTI LQHTVREL ADVOLRQVA
401  NTRSRVQAD LAALCSEAL QATKQDGLI DLEETIDAE VDSLVATID
451  DFHMLSQEN PSALRETVS VQVQVNDIO GLEQVGRIL ELVQVVFSP
501  DFLKLVQMT SRYVLFQFF GQRTLLARA IANQGANFI SIKSFELLN
551  FEDEKATYR ELFDKAGAA RCVLFFRLD SEARAGQNI GQGGAGQVY
601  IMLITMDK MRYVWVTLI QATNAPDID PALLAROLD QLYVFLRQ
651  KSHVAILFAS LRSFVAVDQ DLEFLAMTN QNSADLTKI QKACVLAIR
701  ESTREIRKE RERQVTPAH EYEDQVPE IRSDHFEAM RPARVVDN

```

### MASCOT Search Results

#### Protein View: O95373

Importin-7 OS=Homo sapiens OX=9606 GN=IPO7 PE=1 SV=1

Database: SwissProt\_AC  
Score: 291  
Nominal mass (M<sub>r</sub>): 120751  
Calculated pI: 4.70  
Taxonomy: [Homo sapiens](#)

Sequence similarity is available as an [NCBI BLAST search of O95373 against nr](#).

#### Search parameters

MS data file: G:\GISTV\20201122\_19\_DARTS1\_B4\_lye.mgf  
Enzyme: Trypsin: cuts C-term side of KR unless next residue is P.  
Fixed modifications: [Carbamidomethyl \(C\)](#)  
Variable modifications: [Oxidation \(M\)](#), [Phospho \(ST\)](#)

Protein sequence coverage: 24%

Matched peptides shown in **bold red**.

```

1  KDFITLIAL RUTMDALRE AAKRQLKRAK KSLRFTSLI QITHRQLQL
51  PFGQAVYV RSHCVVQD KSLAPSTIR YTFPESAK IRADVLAIT
101  KSHLLRQVL TPCHEIRKE DTHRGLATY DSRFTGLQD IRADVLSLL
151  CLVQVYVE YHFEERAPL VAAKQFLPY LKSRFQLLS DQSQVRLQ
201  KQIFRIFAL VQTLISLLI HQGLTERIE ILRTVVRQV RSTLQVRED
251  DRPELPKRC KHALRILAR LPRVDSDFH VYGVNRFAS VFLKAFAYV
301  QQLRLAQVY THERGMAIR VQGLITSTP QYFALTYR ELPSTGLIT
351  QVVFELQV TRADKIRGE SPVETIRNP DYPDFIRPT FAQTALAPA
401  CWKPEVQK TGRFVQLLT EPGLSRSDG SALHSGSLA EILLRRTYK
451  QHETVQGN VFLFSELS THARACKVL RYFCVFFES DQNLQVLEL
501  TRCLDRKE NPQVTAALIA LQVLINQER ABEVITFFR FQNALMIT
551  RPTMDGLN VQVQICETI ERYFVAFR THCAHFFQ VIGQVQSD
601  SDGAVTAM ILITDILLS VYEDSRITQ QSRDLCVLT QVYQVQVLE
651  FYEEFSLAN ELTQGVRSQ HGLFLRIVE VQGGDFQYF THGSLRMY
701  VTVDITLLS DTYLMEYS MGRVLYQVA GEDAKQBAK LUVVILQK

```

Figure S2: By way of example, it is reported the full Mascot output for the identification of the three protected proteins in the cell lysate, together with the protein sequence coverage percentage.

| Q1 m/z | Q3 m/z | Sequence                 | ID          | R.T. (min) |
|--------|--------|--------------------------|-------------|------------|
| 249.40 | 203.13 | HLHFTLVK                 | H[35-42]K   | 3.28       |
| 447.23 | 457.76 | DYFFALAHTVR              | D[51-61]R   | 4.67       |
| 375.51 | 467.23 | TQQHYVER                 | T[71-78]R   | 3.75       |
| 777.89 | 802.36 | IYLSLEFYMG               | I[83-94]R   | 7.21       |
| 573.29 | 275.17 | YFEGIFNQK                | Y[162-170]K | 3.71       |
| 915.45 | 775.37 | IVNGWQVEEADDWLR          | I[171-185]R | 7.43       |
| 447.21 | 559.29 | YGNPWEEK                 | Y[186-192]K | 4.64       |
| 434.72 | 542.27 | ARPEYMLPVHFGYGR          | A[193-206]R | 3.77       |
| 475.23 | 721.37 | NNTVNTMR                 | N[236-243]R | 5.82       |
| 933.97 | 290.15 | LQDFNVGDYIEAVLDR         | L[255-270]R | 7.38       |
| 721.85 | 615.78 | VLYPNDNFFEGK             | V[279-290]K | 5.36       |
| 572.75 | 359.19 | TC[160]FETFPDK           | T[325-333]K | 5.64       |
| 706.72 | 563.82 | VAIQNDTHPALSIPELMR       | V[334-352]R | 5.4        |
| 408.25 | 589.32 | ILVDVEK                  | I[353-359]K | 5.23       |
| 625.64 | 357.69 | TC[160]AYTNHTVLPEALER    | T[372-387]R | 4.95       |
| 512.25 | 837.42 | WPVSMFEK                 | W[388-395]K | 4.68       |
| 457.26 | 560.31 | HLEIYAINQR               | H[400-410]R | 5.36       |
| 554.62 | 658.32 | HLDHVAALFPGDVDR          | H[411-425]R | 5.95       |
| 505.52 | 516.29 | INMAHLC[160]VIGSHAVNGVAR | I[440-458]R | 5.78       |
| 275.83 | 288.17 | IHSEIVK                  | I[459-465]K | 3.33       |
| 585.27 | 373.21 | DFYELEPEK                | D[471-479]K | 5.6        |
| 921.50 | 375.22 | WLLLC[160]NPGLADTIVEK    | W[492-507]K | 7.47       |
| 700.91 | 964.51 | LLPLVSDDEVFIR            | L[522-533]R | 7.23       |
| 421.23 | 389.24 | FSAFLEK                  | F[546-552]K | 3.62       |
| 581.65 | 242.15 | QLLNC[160]LHVVTLYNR      | Q[577-590]R | 4.83       |
| 353.20 | 374.24 | TVMIGGK                  | T[603-609]K | 3.36       |
| 315.83 | 218.15 | AAPGYHMAK                | A[610-618]K | 3.45       |
| 631.33 | 840.42 | LVTSIGDVVNHDPPVVGDR      | L[623-640]R | 5.62       |
| 527.29 | 581.27 | VIFLENYR                 | V[643-650]R | 3.2        |
| 436.22 | 589.3  | EYYDHLPELK               | E[731-740]K | 4.61       |
| 755.88 | 769.39 | QAVDQISSGFFSPK           | Q[741-754]K | 7.07       |
| 345.92 | 290.15 | DIVNMLMHDR               | D[761-771]R | 3.75       |
| 375.18 | 522.23 | NIAC[160]SGK             | N[805-811]K | 4.09       |
| 427.22 | 639.31 | TITEYAR                  | T[817-823]R | 4.22       |
| 719.72 | 347.21 | EIWGVEPSDLQIPPNIPR       | E[824-842]R | 5.95       |

**Figure S3:** Here the list of the tryptic peptides of PYGB found by LiP-MS has been reported together with the m/z value, the m/z value of the best fragment, the primary sequence, the ID on the protein sequence and the r.t. in the UPLC trace.

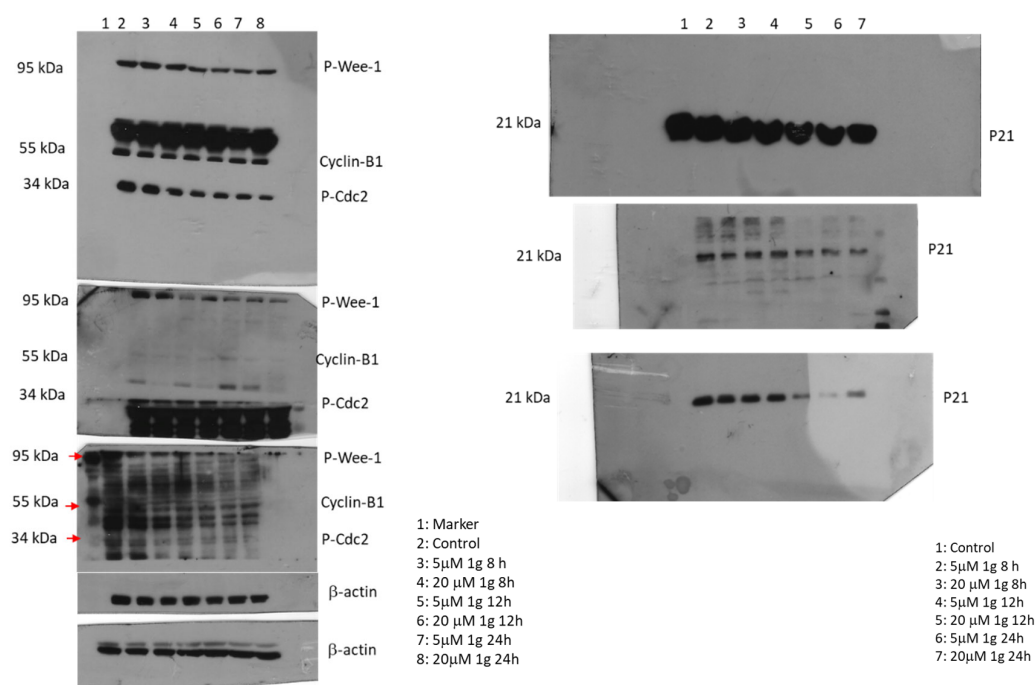

Figure S4: Uncropped Western Blotting experiment as reported in Figure 2A

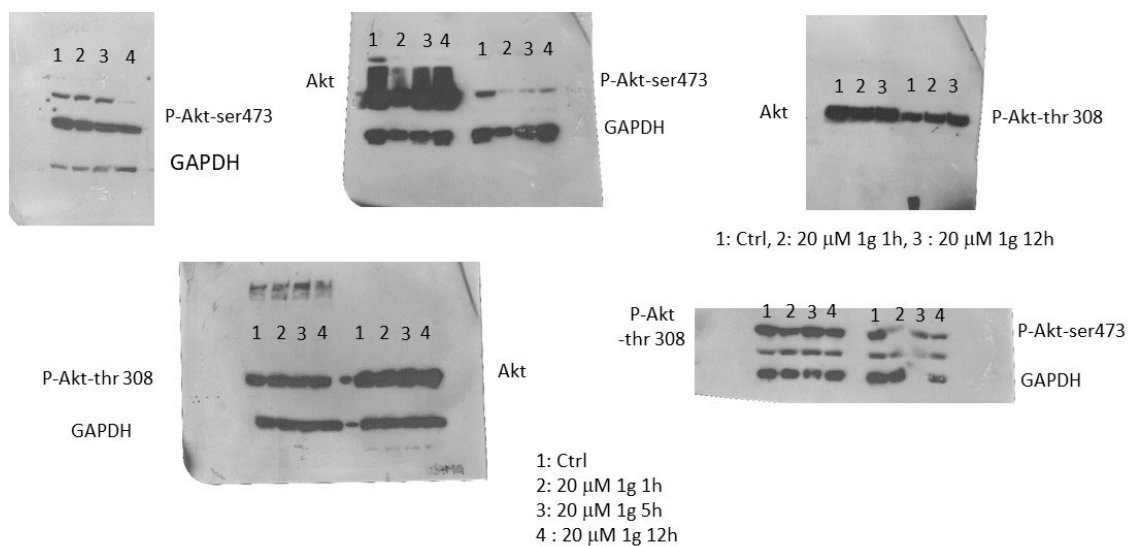

Figure S5: Uncropped Western Blotting experiment as reported in Figure 2C

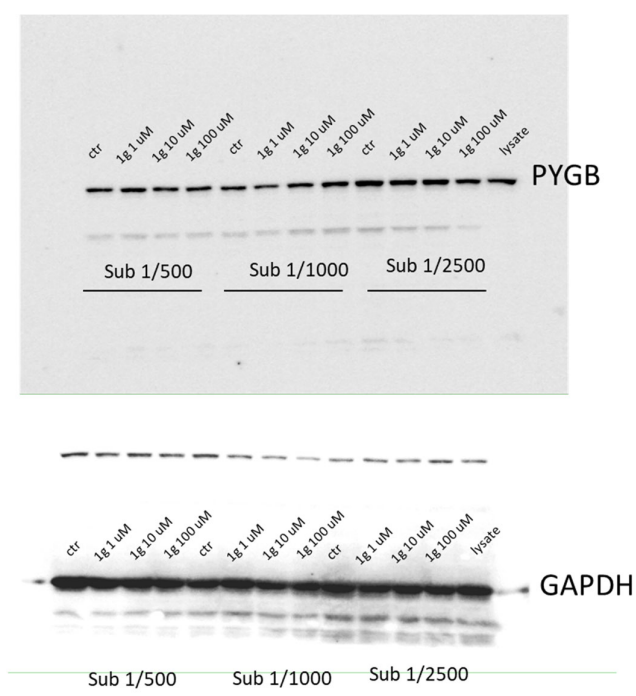

**Figure S6:** Uncropped Western Blotting experiment as reported in Figure 3E

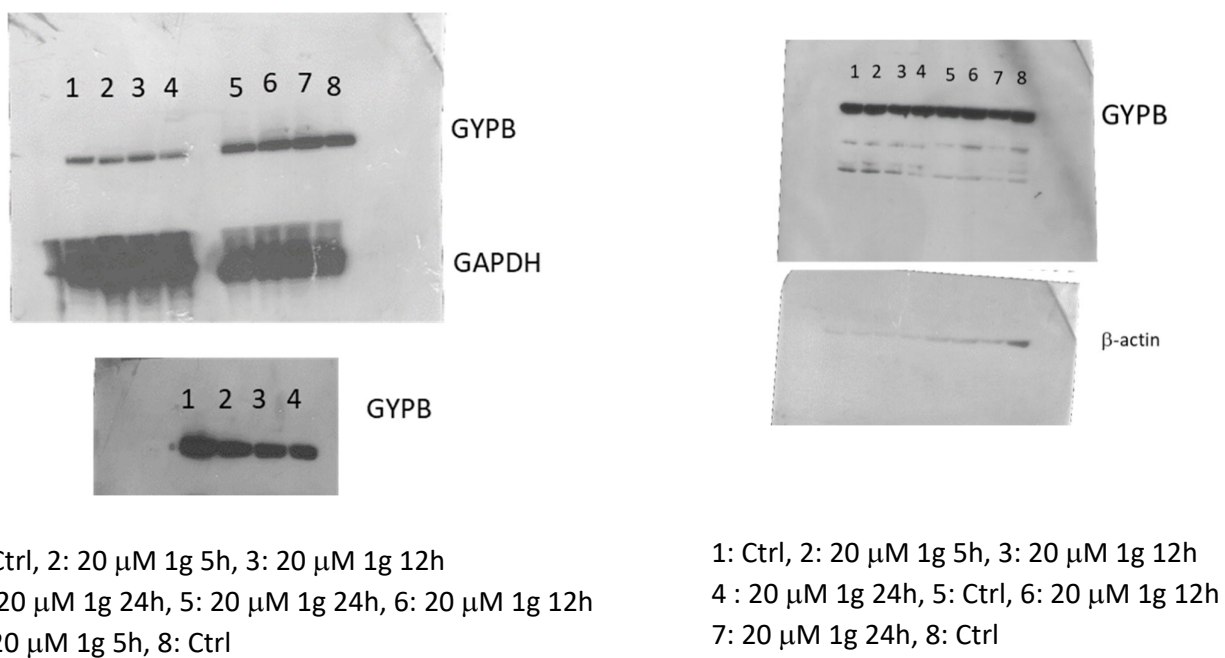

**Figure S7:** Uncropped Western Blotting experiment as reported in Figure 5B
